# Supplementary material for: Tumor density is associated with response to endobronchial ultrasound-guided transbronchial needle injection of cisplatin
Source: PubMed Central journal article supplement — J Thorac Dis. 2020 Sep;12(9):4825–32. doi: 10.21037/jtd-20-674 (PMC7578514; doi:10.21037/jtd-20-674), 2020-09
Supplement: jtd-12-09-4825-dss.pdf [file jtd-12-09-4825-dss.pdf]

## Data Sharing Statement

|                     |                                                                                                                                                    |                                                                        |
|---------------------|----------------------------------------------------------------------------------------------------------------------------------------------------|------------------------------------------------------------------------|
| <b>Article Info</b> | Article information: <a href="http://dx.doi.org/10.21037/jtd-20-674">http://dx.doi.org/10.21037/jtd-20-674</a> .                                   |                                                                        |
| <b>Item</b>         | <b>Question</b>                                                                                                                                    | <b>Authors' Response<br/>(place "-" if not applicable)</b>             |
| 1                   | Would you like to share data collected for your study to others?                                                                                   | No                                                                     |
| 2                   | If not, would you like to share the reason for your decision?                                                                                      | It is patient level data that requires IRB approval, GCP training, etc |
| 3                   | What data in particular will be shared?                                                                                                            | -                                                                      |
| 4                   | Any other documents will be share? Such as study protocol, statistical analysis plan, informed consent form, clinical study report, analytic code. | -                                                                      |
| 5                   | When will data availability begin?                                                                                                                 | -                                                                      |
| 6                   | When will data availability end?                                                                                                                   | -                                                                      |
| 7                   | To whom will you share the data?                                                                                                                   | -                                                                      |
| 8                   | For what type of analysis or purpose?                                                                                                              | -                                                                      |
| 9                   | How or where can the data/documents be obtained?                                                                                                   | -                                                                      |
| 10                  | Any other restrictions?                                                                                                                            | -                                                                      |
